# Supplementary material for: A chemical/molecular 4-input/2-output keypad lock with easy resettability based on red-emission carbon dots–Prussian blue composite film electrodes
Source: Royal Society of Chemistry journal article supplement (doi:10.1039/c8nr01258j), 2018-01-01
Supplement: c8nr01258j1.pdf [file c8nr01258j1.pdf]

## **Electronic Supplementary Information**

### **A chemical/molecular 4-input/2-output keypad lock with easy resetability based on red-emission carbon dots-Prussian blue composite film electrodes**

Menglu Li,<sup>‡,a</sup> Zifei Wang,<sup>‡,a</sup> Jiying Liang,<sup>a</sup> Huiqin Yao,<sup>b</sup> Li Shen,<sup>c</sup> Hongyun Liu,<sup>\*,a</sup>  
Louzhen Fan,<sup>\*,a</sup>

<sup>a</sup> College of Chemistry, Beijing Normal University, Beijing 100875, P. R. China

<sup>b</sup> Department of Chemistry, Ningxia Medical University, Yinchuan 750004, P. R.  
China

<sup>c</sup> Logistics School, Beijing Wuzi University, Beijing 101149, P. R. China

\*Corresponding author: E-mail: liuhongyun@bnu.edu.cn, lzf@bnu.edu.cn.

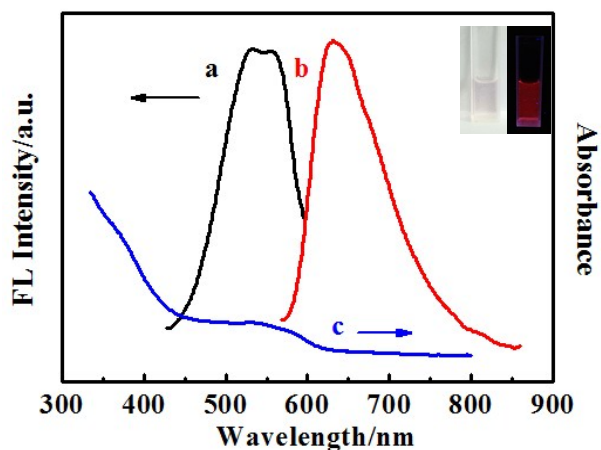

**Fig. S1** (a) Excitation and (b) emission spectra of fluorescence (FL), and (c) UV-vis absorption spectrum of rCDs dispersions in pH 5.0 buffers. Inset: The photographs of rCDs aqueous dispersions under the natural light (left) and the UV excitation at 365 nm (right).

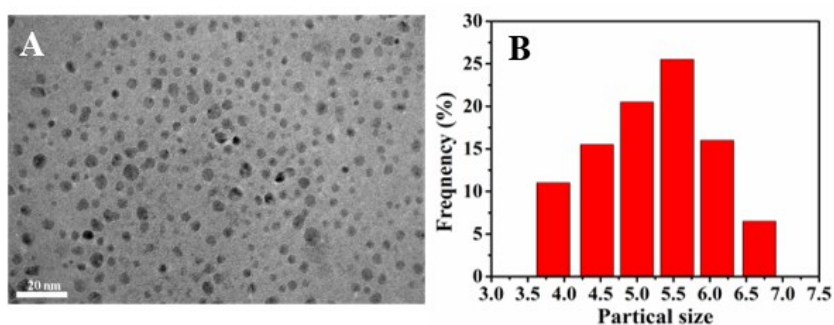

**Fig. S2** (A) TEM image of rCDs. (B) Particle size distribution of rCDs.

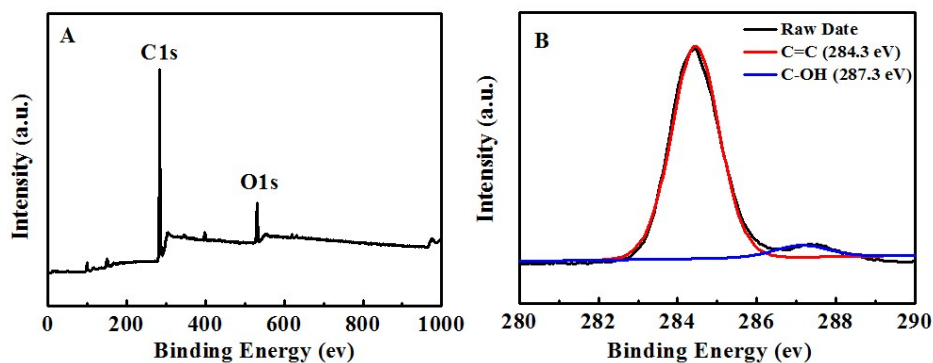

**Fig. S3** (A) XPS spectrum of rCDs. (B) Deconvoluted high-resolution C1s XPS spectra.

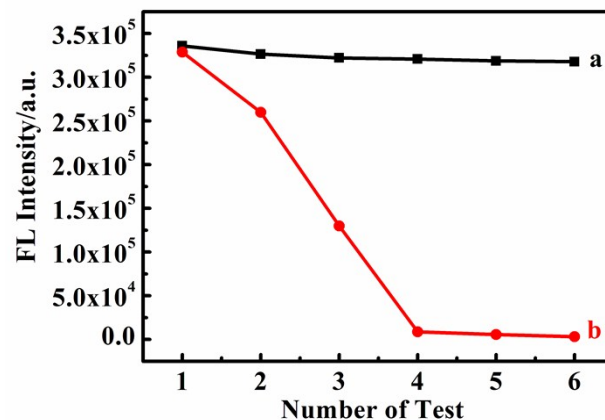

**Fig. S4** Variation of fluorescence emission (FL) intensity at 630 nm under excitation at 530 nm on the number of repeated tests for (a) rCDs-Chi/PW and (b) rCDs/PW films in pH 5.0 buffers.

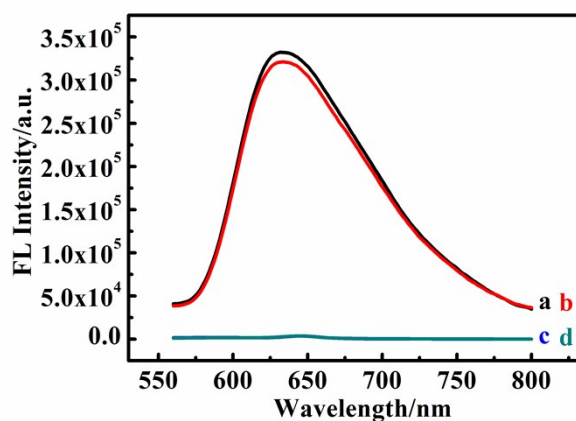

**Fig. S5** Fluorescence emission (FL) spectra of rCDs-Chi film electrodes after the application of (a)  $-0.2$  V and (b)  $0.4$  V in pH 5.0 buffers under the excitation at 530 nm. FL spectra of (c) Chi/PB and (d) Chi/PW film electrodes under the excitation at 530 nm in pH 5.0 buffers.

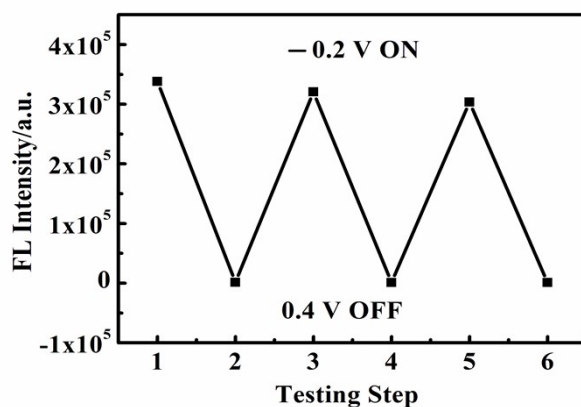

**Fig. S6** Variation of fluorescence emission (FL) intensity at 630 nm with the application of potentials switched between  $-0.2$  and  $0.4$  V for rCDs-Chi/PB film modified electrodes in pH 5.0 buffers.

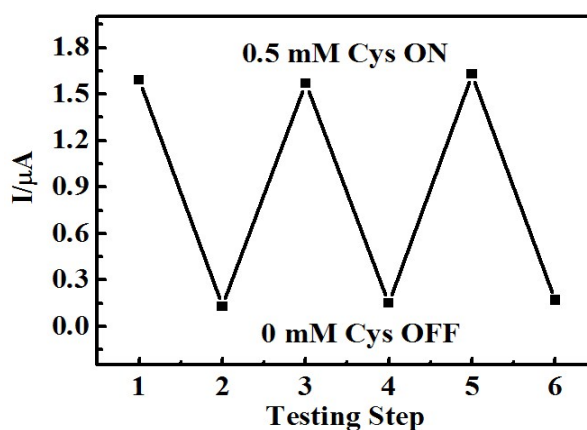

**Fig. S7** Variation of amperometric currents ( $I$ ) at rCDs-Chi/PB film electrodes in pH 5.0 buffers under the potential of  $0.4$  V with switching the film electrodes in the solution between in the presence of  $0.5$  mM Cys and in the absence of Cys.

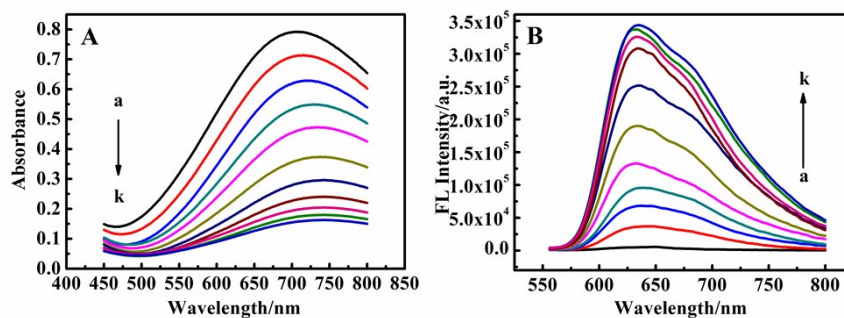

**Fig. S8** (A) UV-vis absorption and (B) fluorescence emission (FL) spectra under the excitation at 530 nm for rCDs-Chi/PB films upon addition of Cys in pH 5.0 buffers with different concentrations: (a) 0, (b) 0.05, (c) 0.10, (d) 0.15, (e) 0.20, (f) 0.25, (g) 0.30, (h) 0.35, (i) 0.40, (j) 0.45 and (k) 0.50 mM.

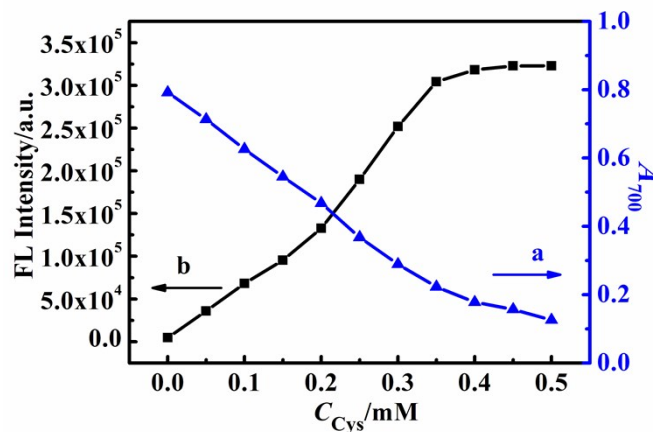

**Fig. S9** Dependence of (a)  $A_{700}$  and (b) fluorescence emission (FL) intensity at 630 nm for rCDs-Chi/PB films upon  $C_{\text{Cys}}$  in pH 5.0 buffers.

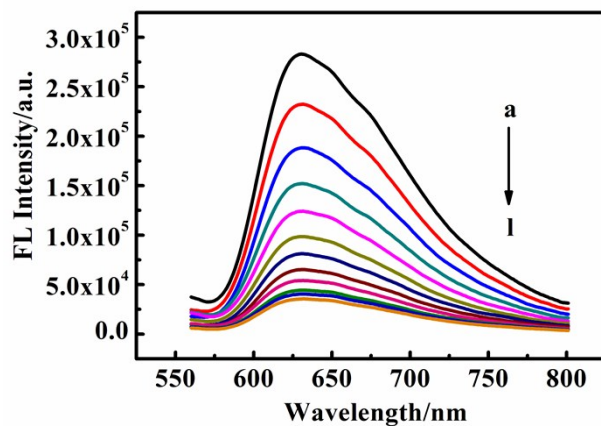

**Fig. S10** Fluorescence emission (FL) spectra under the excitation at 530 nm for rCDs-Chi/PW films upon addition of  $\text{Fe}^{3+}$  in pH 5.0 buffers at different concentrations: (a) 0, (b) 0.1, (c) 0.2, (d) 0.3, (e) 0.4, (f) 0.5, (g) 0.6, (h) 0.7, (i) 0.8, (j) 0.9, (k) 1.0 and (l) 1.1 mM.

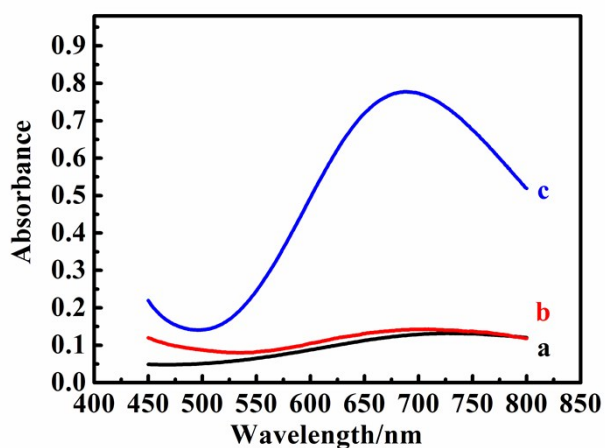

**Fig. S11** UV-vis spectra of (a) rCDs-Chi/PW films, (b) rCDs-Chi/PW films with 1.0 mM  $\text{Fe}^{3+}$ , and (c) rCDs-Chi/PB films in pH 5.0 buffers.

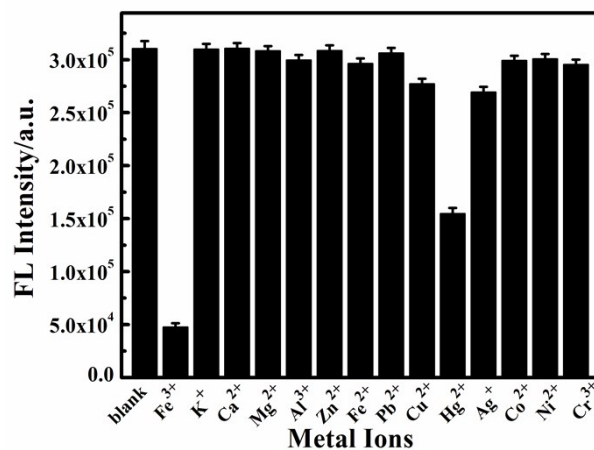

**Fig. S12** Fluorescence emission (FL) intensity at 630 nm under the excitation at 530 nm for rCDs-Chi/PW films upon addition of various metal ions at 0.9 mM in pH 5.0 buffers.

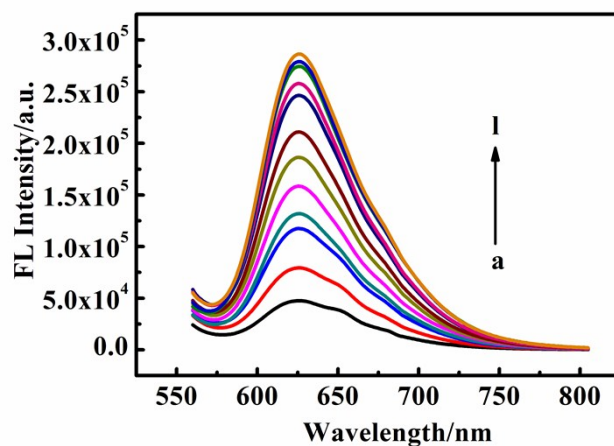

**Fig. S13** Fluorescence emission (FL) spectra under the excitation at 530 nm for rCDs-Chi/PW films with 1.0 mM Fe<sup>3+</sup> in pH 5.0 buffers upon addition of Cys at various concentrations: (a) 0, (b) 0.1, (c) 0.2, (d) 0.3, (e) 0.4, (f) 0.5, (g) 0.6, (h) 0.7, (i) 0.8, (j) 0.9, (k) 1.0, (l) 1.1 mM.

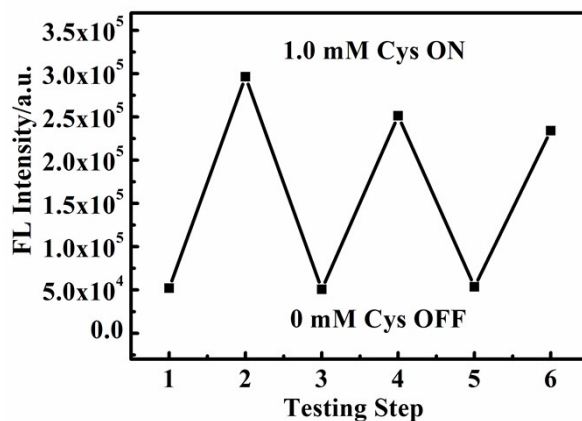

**Fig. S14** Dependence of fluorescence (FL) intensity at 630 nm for rCDs-Chi/PW films in pH 5.0 buffers with 1.0 mM  $\text{Fe}^{3+}$  upon switching the composite films in the buffers between in the presence of 1.0 mM Cys and in the absence of Cys.

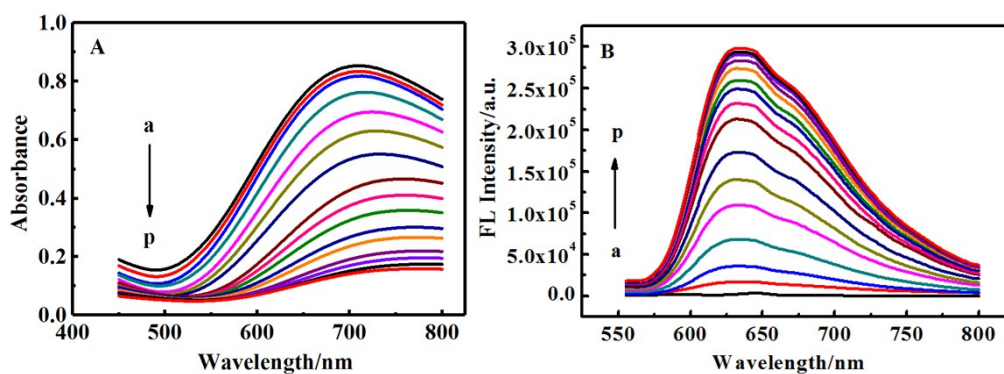

**Fig. S15** (A) UV-vis absorption spectra and (B) fluorescence emission (FL) spectra under the excitation at 530 nm for rCDs-Chi/PB films in pH 5.0 buffers with 1.0 mM  $\text{Fe}^{3+}$  upon addition of Cys at different concentrations: (a) 0, (b) 0.1, (c) 0.2, (d) 0.3, (e) 0.4, (f) 0.5, (g) 0.6, (h) 0.7, (i) 0.8, (j) 0.9, (k) 1.0, (l) 1.1, (m) 1.2, (n) 1.3, (o) 1.4 and (p) 1.5 mM.



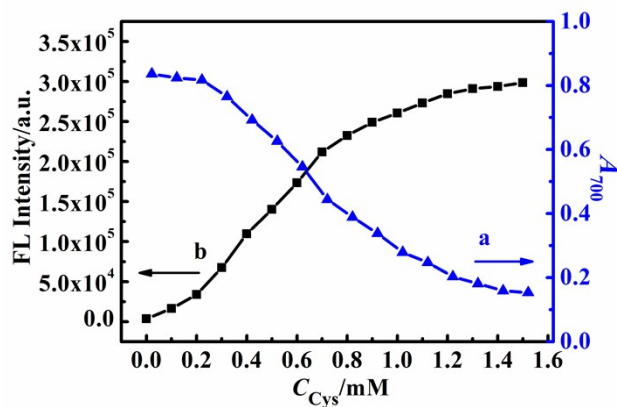

**Fig. S16** Dependence of (a)  $A_{700}$  and (b) fluorescence emission (FL) intensity at 630 nm for rCDs-Chi/PB films in pH 5.0 buffers with 1.0 mM  $Fe^{3+}$  upon  $C_{Cys}$ .

**Table S1.** Truth table of the 3-input/3-output logic gate circuit

| Input 1   | Input 2   | Input 3 | Output A | Output B  | Output C    |
|-----------|-----------|---------|----------|-----------|-------------|
| Potential | $Fe^{3+}$ | Cys     | $I$      | $A_{700}$ | FL (630 nm) |
| 0         | 0         | 0       | 0        | 0         | 1           |
| 0         | 0         | 1       | 0        | 0         | 1           |
| 0         | 1         | 0       | 0        | 0         | 0           |
| 0         | 1         | 1       | 0        | 0         | 1           |
| 1         | 0         | 0       | 0        | 1         | 0           |
| 1         | 0         | 1       | 1        | 0         | 1           |
| 1         | 1         | 0       | 0        | 1         | 0           |
| 1         | 1         | 1       | 1        | 0         | 1           |

**Table S2.** Definition of 4 inputs and 2 outputs for the keypad lock

| Inputs     |                            |                         |                         |
|------------|----------------------------|-------------------------|-------------------------|
| C          | U                          | E                       | F                       |
| 1.5 mM Cys | Excitation light at 530 nm | 0.4 V 100 s             | 1.0 mM Fe <sup>3+</sup> |
| Outputs    |                            |                         |                         |
|            | AM                         | FL                      |                         |
|            | <i>I</i> /μA               | FL at 630 nm            |                         |
| 1          | > 1.0                      | > 2.0 × 10 <sup>5</sup> |                         |
| 0          | ≤ 1.0                      | ≤ 2.0 × 10 <sup>5</sup> |                         |

**Table S3.** Truth table of the 4-input/2-output keypad lock

| Input Order |   |   |   | Output AM | Output FL |
|-------------|---|---|---|-----------|-----------|
| C           | U | E | F | 1         | 1         |
| C           | U | F | E | 0         | 1         |
| C           | E | U | F | 1         | 0         |
| C           | E | F | U | 1         | 0         |
| C           | F | U | E | 0         | 1         |
| C           | F | E | U | 0         | 0         |
| U           | C | E | F | 1         | 0         |
| U           | C | F | E | 0         | 0         |
| U           | E | C | F | 0         | 0         |
| U           | E | F | C | 0         | 0         |
| U           | F | C | E | 0         | 0         |
| U           | F | E | C | 0         | 0         |
| E           | C | U | F | 0         | 1         |
| E           | C | F | U | 0         | 1         |
| E           | U | C | F | 0         | 0         |
| E           | U | F | C | 0         | 0         |
| E           | F | C | U | 0         | 1         |
| E           | F | U | C | 0         | 0         |
| F           | C | U | E | 0         | 0         |
| F           | C | E | U | 0         | 1         |
| F           | U | C | E | 0         | 0         |
| F           | U | E | C | 0         | 0         |
| F           | E | C | U | 0         | 1         |
| F           | E | U | C | 0         | 0         |
